# Supplementary material for: Fabrication of a high-efficiency CdS@TiO2@C/Ti3C2 composite photocatalyst for the degradation of TC-HCl under visible light
Source: Royal Society of Chemistry journal article supplement (doi:10.1039/d1nj05786c), 2022-01-01
Supplement: d1nj05786c1.pdf [file d1nj05786c1.pdf]

## Supplementary Information

### Fabrication of high-efficiency CdS@TiO<sub>2</sub>@C/Ti<sub>3</sub>C<sub>2</sub> composites photocatalyst for the degradation of TC-HCl under visible light

Juanjuan Ren,<sup>a</sup> Lili Wang,<sup>a</sup> Qianqian Gong,<sup>b</sup> Jingyue Xuan,<sup>b</sup> Meiling Sun,<sup>b</sup> Qi Zhang,<sup>b</sup> Haifeng Zhang,<sup>b</sup> Guangchao Yin<sup>\*b</sup> and Bo Liu<sup>\*ab</sup>

<sup>a</sup>School of Material Science and Engineering, Shandong University of Technology, Zibo, Shandong, 255000, China.

<sup>b</sup>Laboratory of Functional Molecules and Materials, School of Physics and Optoelectronic Engineering, Shandong University of Technology, Zibo, Shandong, 255000, China.

\*Corresponding author. Fax: +86 533 2783909

E-mail address: yingc@sdut.edu.cn (G. C. Yin), liub@sdut.edu.cn (B. Liu).

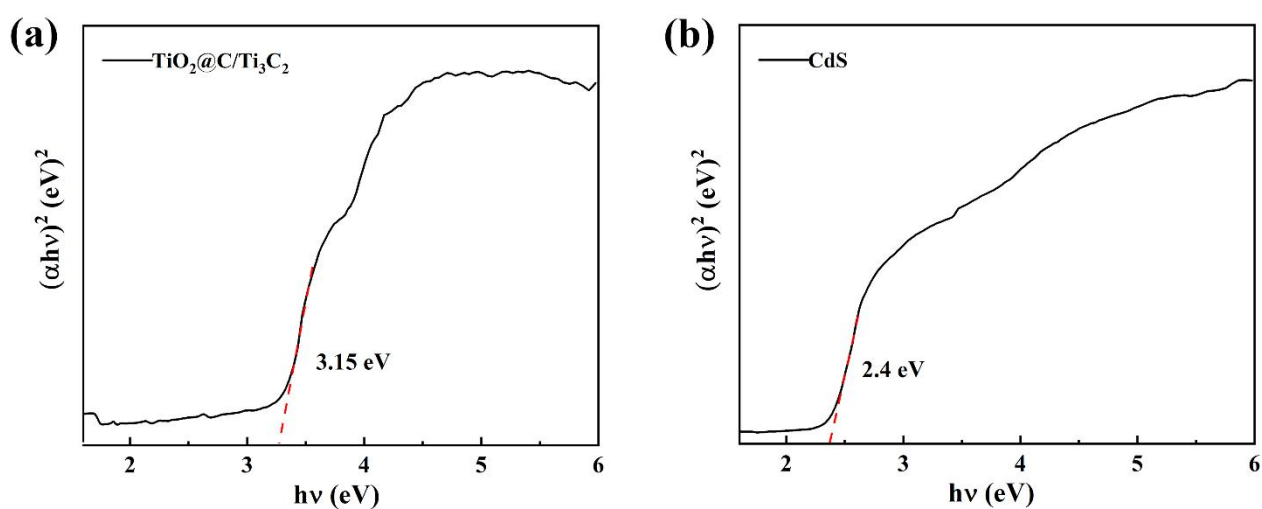

Fig. S1 Band gaps of C@T@CT-2 and CdS samples.

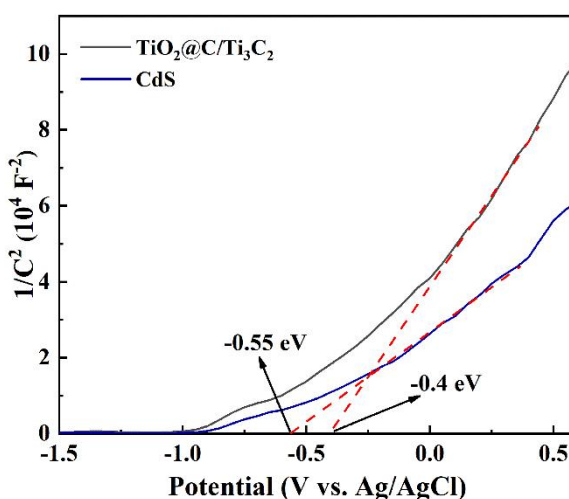

Fig. S2 Mott-Schottky curves of  $\text{TiO}_2@\text{C}/\text{Ti}_3\text{C}_2$  and CdS samples.

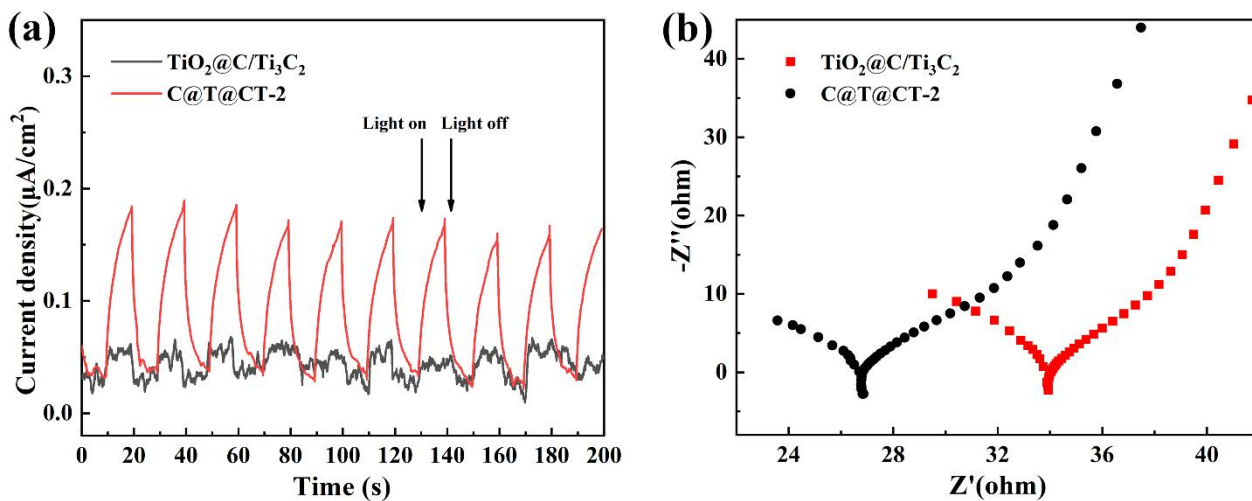

Fig. S3 Transient photocurrent responses (a) and EIS curves (b) of  $\text{TiO}_2@\text{C}/\text{Ti}_3\text{C}_2$  and  $\text{C}@\text{T}@\text{CT}-2$  samples.

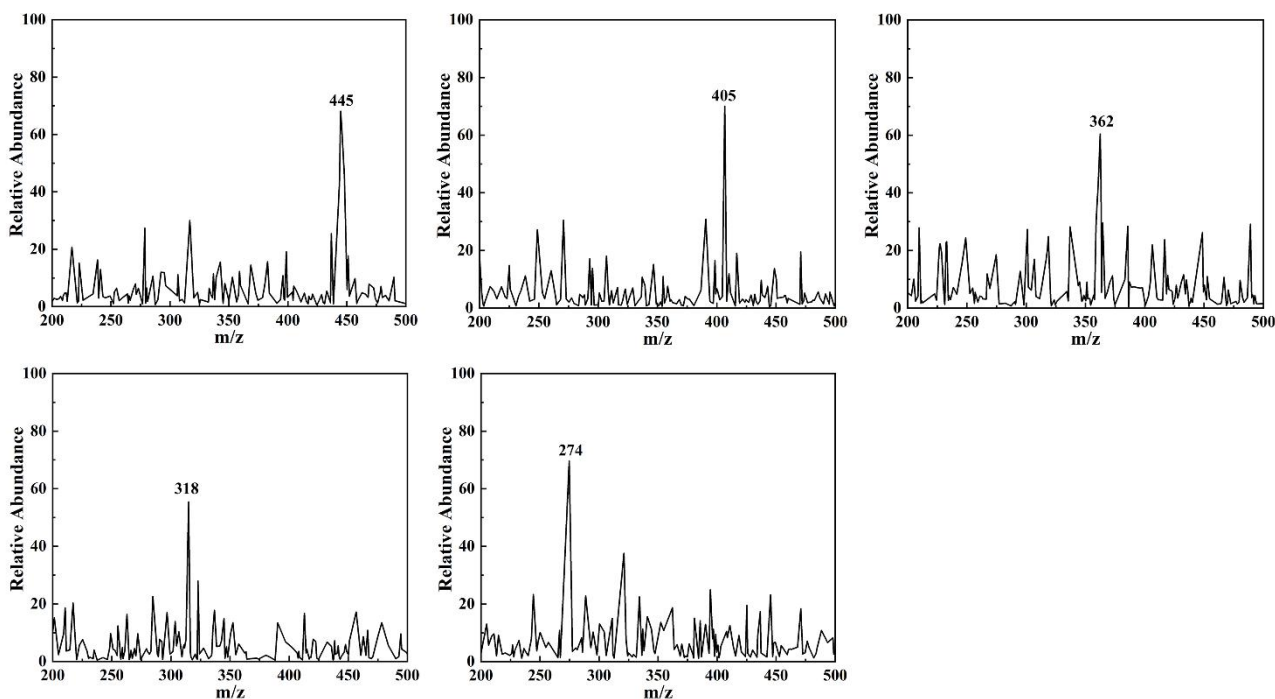

Fig. S4 Principal by-products of TC-HCl degradation detected by LC-MS.

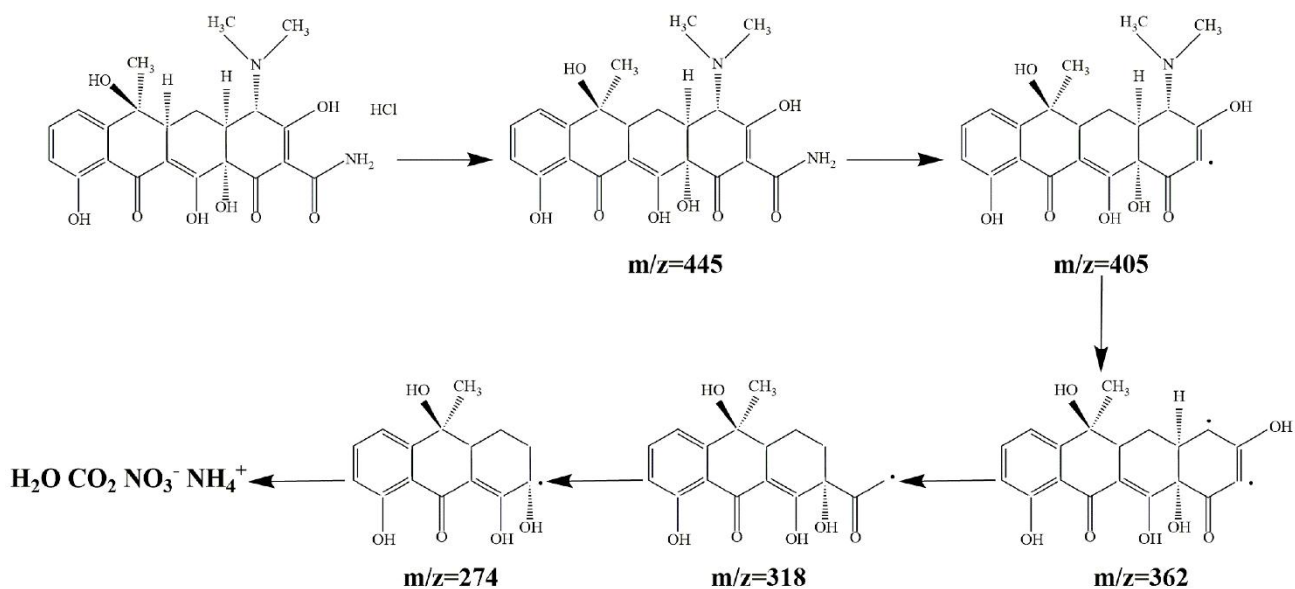

**Fig. S5** The proposed photodegradation pathways of TC-HCl by CdS@TiO<sub>2</sub>@C/Ti<sub>3</sub>C<sub>2</sub>.

The possible degradation pathway of TC-HCl was as follows:  $m/z = 445 \rightarrow m/z=405$  (by loss of  $-\text{CONH}_2$ )  $\rightarrow m/z=362$  (by loss of  $-\text{N}(\text{CH}_3)_2$ )  $\rightarrow m/z=318$  (by loss of  $-\text{CH}_2\text{C}(\text{OH})$ )  $\rightarrow m/z=274$  (then by loss of  $-\text{COCH}_2$ ).
