# Supplementary figures and images for: Fabrication of a high-efficiency CdS@TiO2@C/Ti3C2 composite photocatalyst for the degradation of TC-HCl under visible light
Source: Royal Society of Chemistry journal article supplement (doi:10.1039/d1nj05786c), 2022-01-01

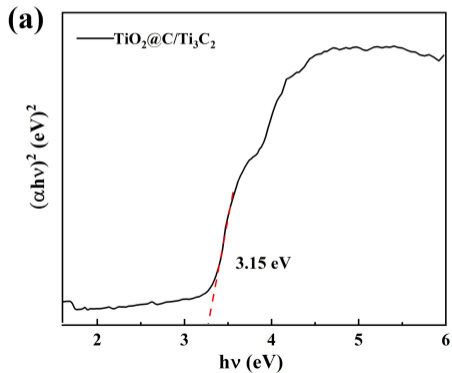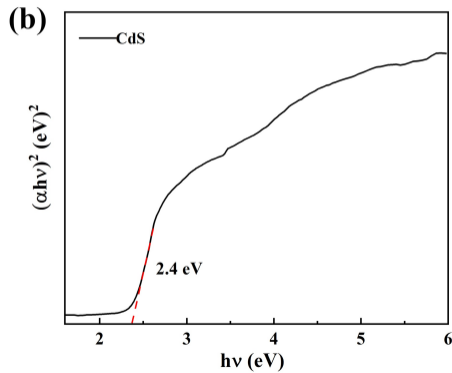

Supplement: d1nj05786c2.pdf [file d1nj05786c2.pdf]

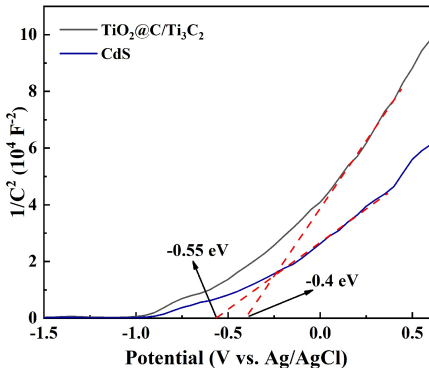

Supplement: d1nj05786c3.pdf [file d1nj05786c3.pdf]

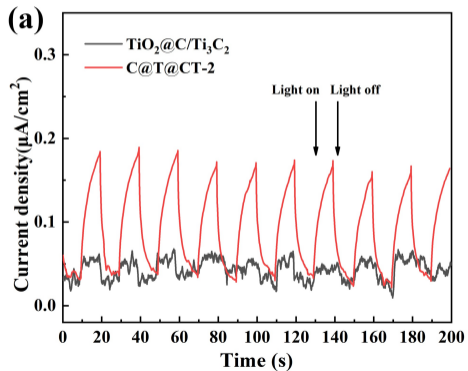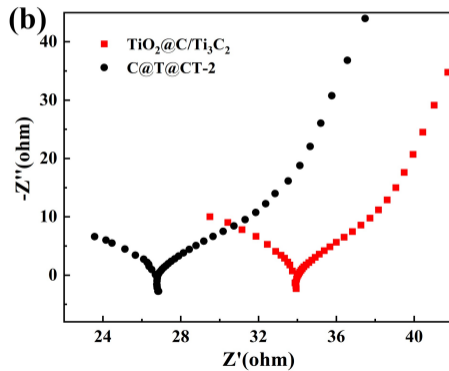

Supplement: d1nj05786c4.pdf [file d1nj05786c4.pdf]

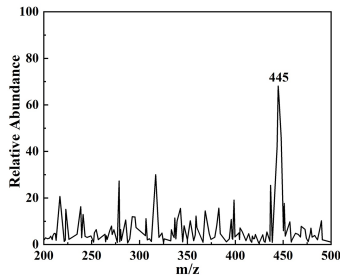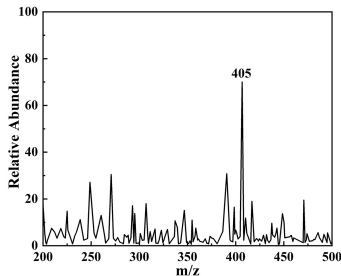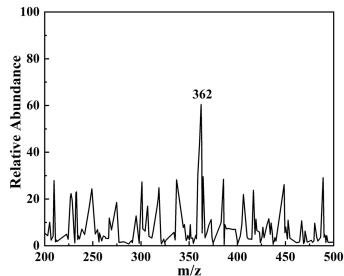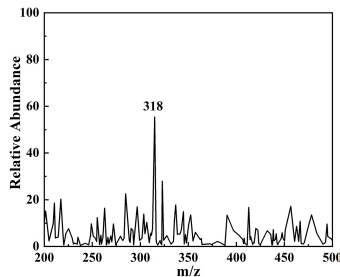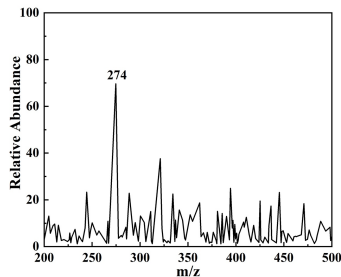

Supplement: d1nj05786c5.pdf [file d1nj05786c5.pdf]

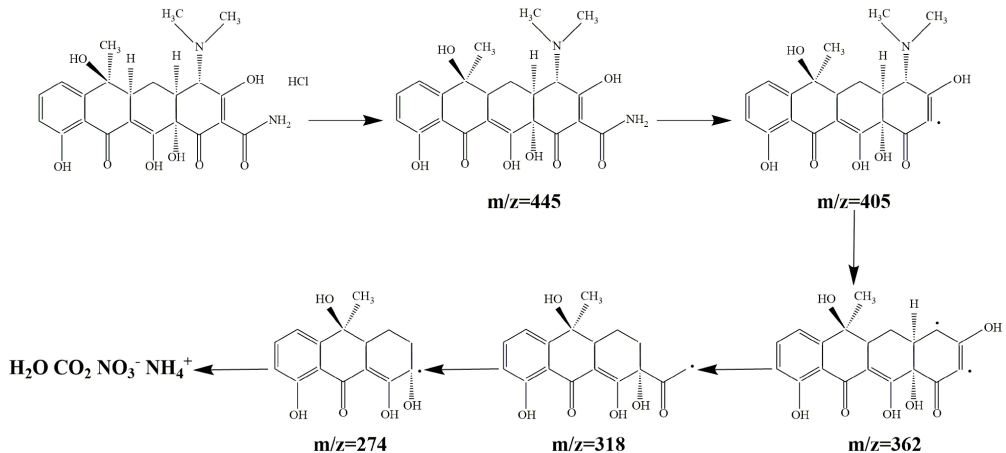

Supplement: d1nj05786c6.pdf [file d1nj05786c6.pdf]
